# Supplementary material for: High surface area siloxene for photothermal and electrochemical catalysis
Source: Royal Society of Chemistry journal article supplement (doi:10.1039/d2nr05140k), 2022-11-29
Supplement: d2nr05140k1.pdf [file d2nr05140k1.pdf]

## Supporting information

### High Surface Area Siloxene for Photothermal and Electrochemical Catalysis

Yize Su,<sup>‡a</sup> Shenghua Wang,<sup>‡a</sup> Liang Ji,<sup>‡a</sup> Chengcheng Zhang,<sup>a</sup> Haiting Cai,<sup>b</sup> Hui  
Zhang<sup>a</sup> and Wei Sun<sup>\*a</sup>

<sup>a</sup>State Key Laboratory of Silicon Materials, School of Materials Science and  
Engineering, Zhejiang University, Hangzhou, Zhejiang 310027, P. R. China.

<sup>b</sup>Institute of Industrial Catalysis, College of Chemical Engineering, Zhejiang  
University of Technology, Hangzhou 310014, China

<sup>‡</sup>These authors contributed equally to this work.

\*Corresponding author: Wei Sun

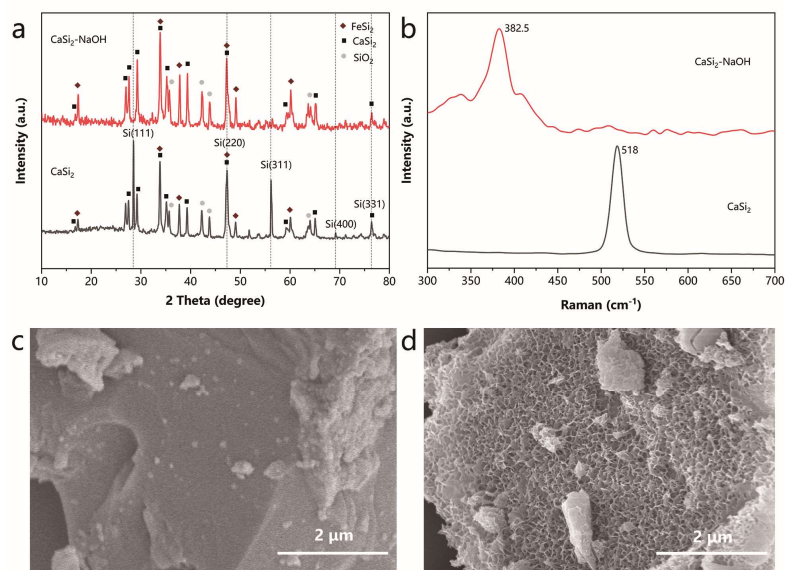

**Fig. S1** (a) XRD patterns of  $\text{CaSi}_2$  and  $\text{CaSi}_2\text{-NaOH}$ . The peaks are labelled according to the standard  $\text{SiO}_2$ , the standard Si, the standard  $\text{FeSi}_2$  and the standard  $\text{CaSi}_2$ . Subtle peaks of  $\text{FeSi}_2$  and  $\text{SiO}_2$  could be observed in the pattern, but all of them were far less pronounced than the Si peaks. (b) Raman spectra of  $\text{CaSi}_2$  and  $\text{CaSi}_2\text{-NaOH}$ . (c) SEM image of  $\text{CaSi}_2$ . (d) SEM image of  $\text{CaSi}_2\text{-NaOH}$ .

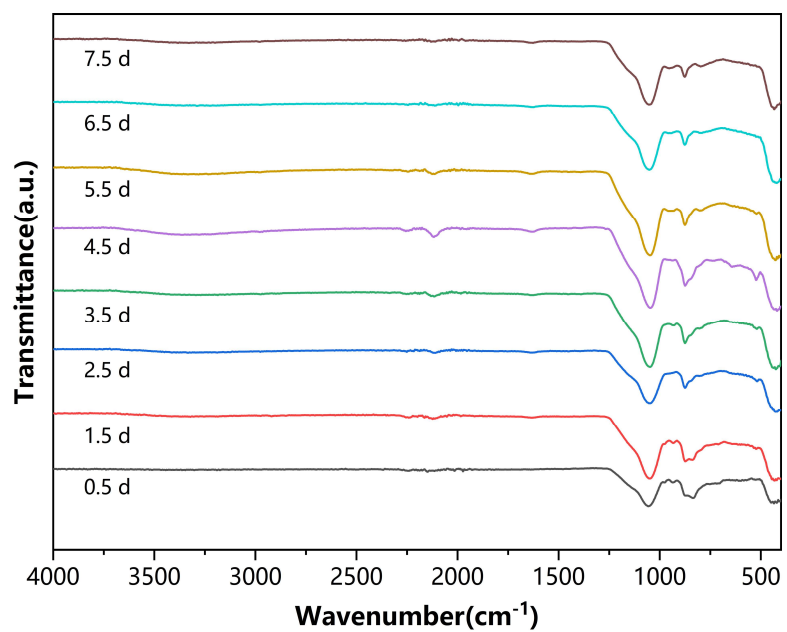

**Fig. S2** FTIR spectra of siloxene prepared with different reaction time.

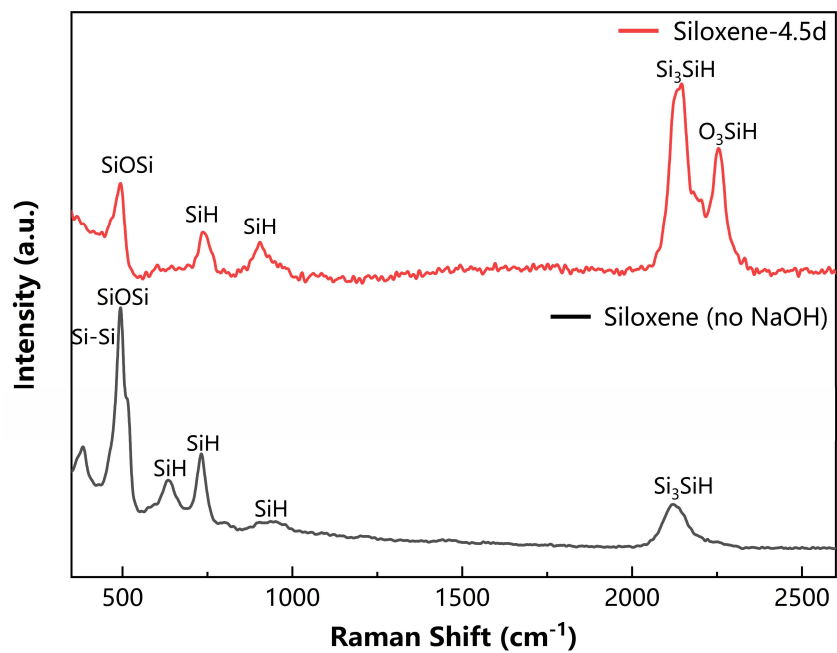

**Fig. S3** Raman spectra of siloxene-4.5d and siloxene (no NaOH).

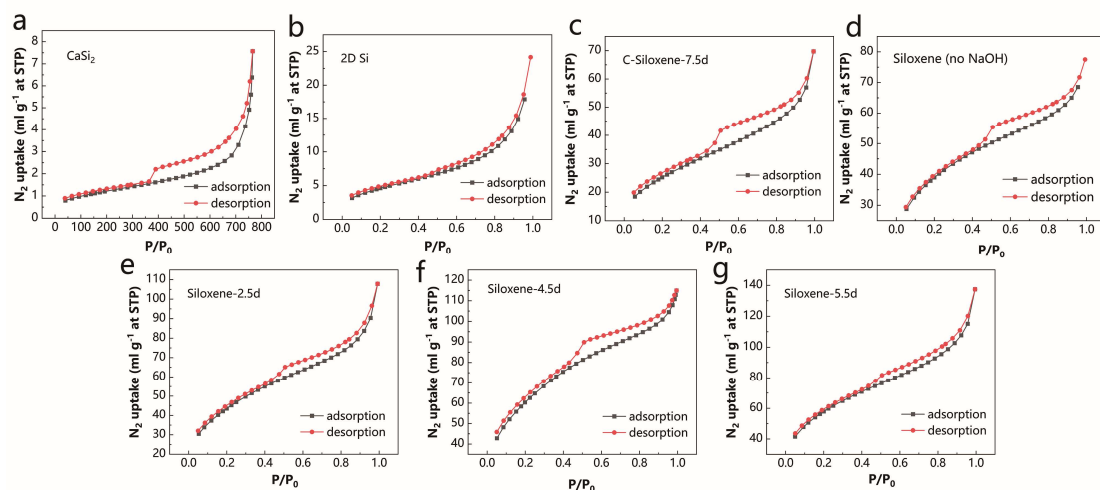

**Fig. S4**  $N_2$  adsorption-desorption isotherms of (a)  $CaSi_2$ , (b) 2DSi, (c) C-siloxene-7.5d, (d) siloxene (no NaOH), (e) siloxene-2.5d, (f) siloxene-4.5d, and (g) siloxene-5.5d.

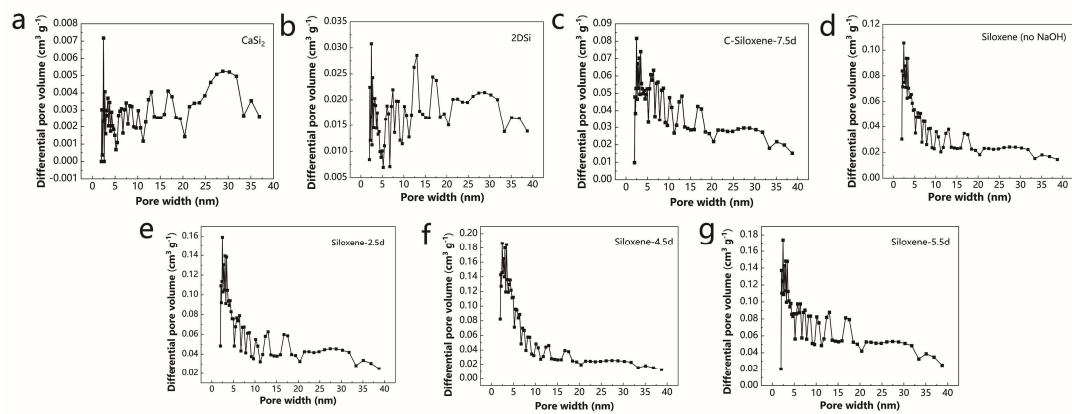

**Fig. S5** Pore size distribution curves of (a) CaSi<sub>2</sub>, (b) 2DSi, (c) C-siloxene-7.5d, (d) siloxene (no NaOH), (e) siloxene-2.5d, (f) siloxene-4.5d, and (g) siloxene-5.5d.

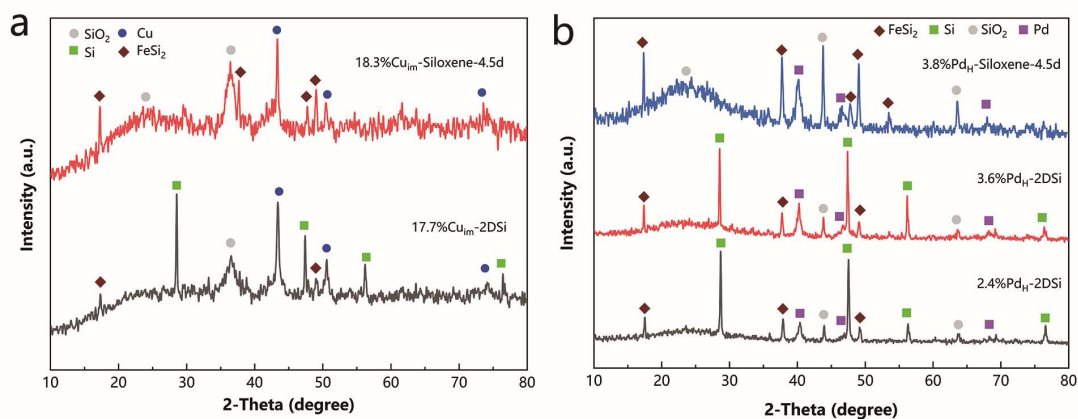

**Fig. S6** (a) XRD patterns of 17.7%Cu<sub>im</sub>-2DSi and 18.3%Cu<sub>im</sub>-Siloxene-4.5d. (b) XRD patterns of 2.4%Pd<sub>H</sub>-2DSi, 3.6%Pd<sub>H</sub>-2DSi and 3.8%Pd<sub>H</sub>-Siloxene-4.5d. The peaks are labelled according to the standard SiO<sub>2</sub>, the standard Si, the standard FeSi<sub>2</sub>, the standard Cu, and the standard Pd.

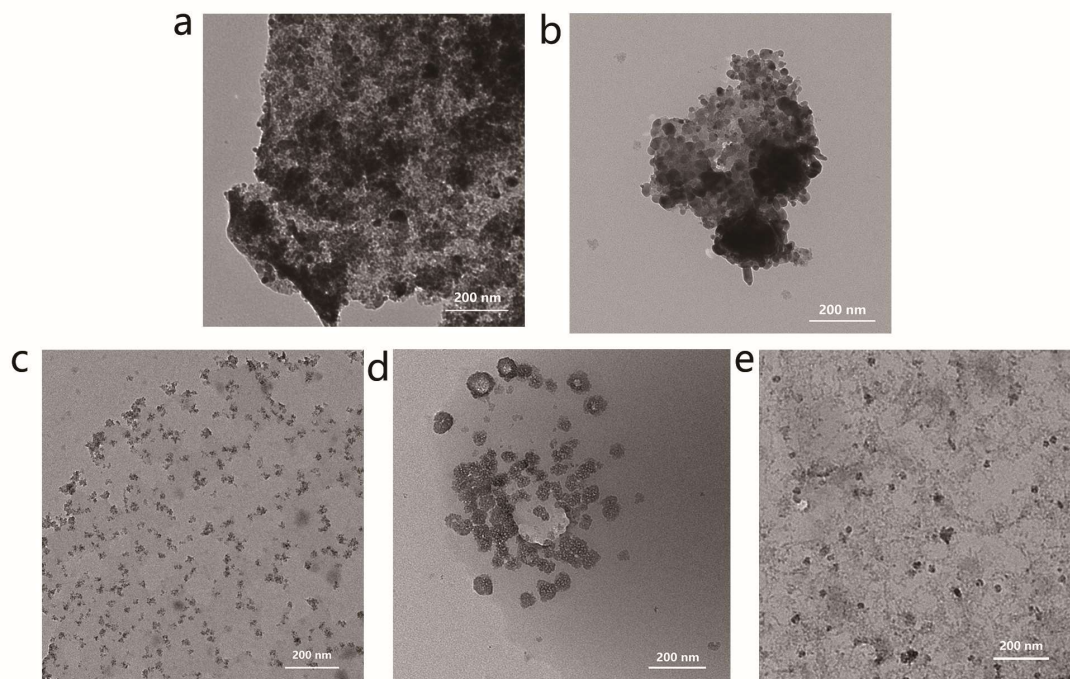

**Fig. S7** TEM images of (a) 17.7%Cu<sub>im</sub>-2DSi, (b) 18.3%Cu<sub>im</sub>-Siloxene-4.5d, (c) 2.4%Pd<sub>H</sub>-2DSi, (d) 3.6%Pd<sub>H</sub>-2DSi, and (e) 3.8%Pd<sub>H</sub>-Siloxene-4.5d.



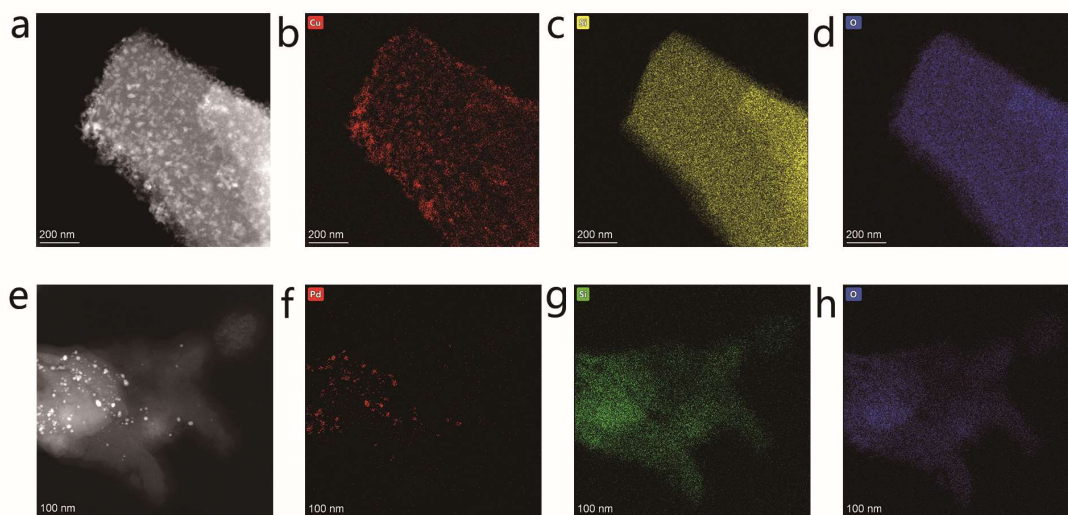

**Fig. S8** EDS mappings of (a-d) 18.3%Cu<sub>im</sub>-siloxene-4.5d and (e-h) 3.8%Pd<sub>H</sub>-siloxene-4.5d.

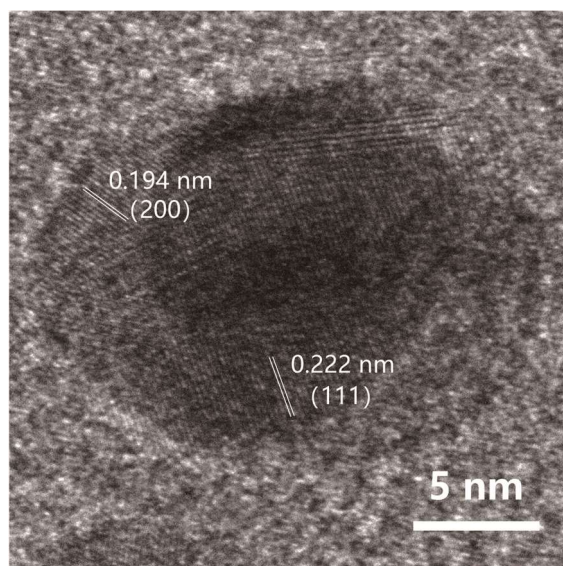

**Fig. S9** HRTEM image of 3.8%Pd<sub>H</sub>-siloxene-4.5d.

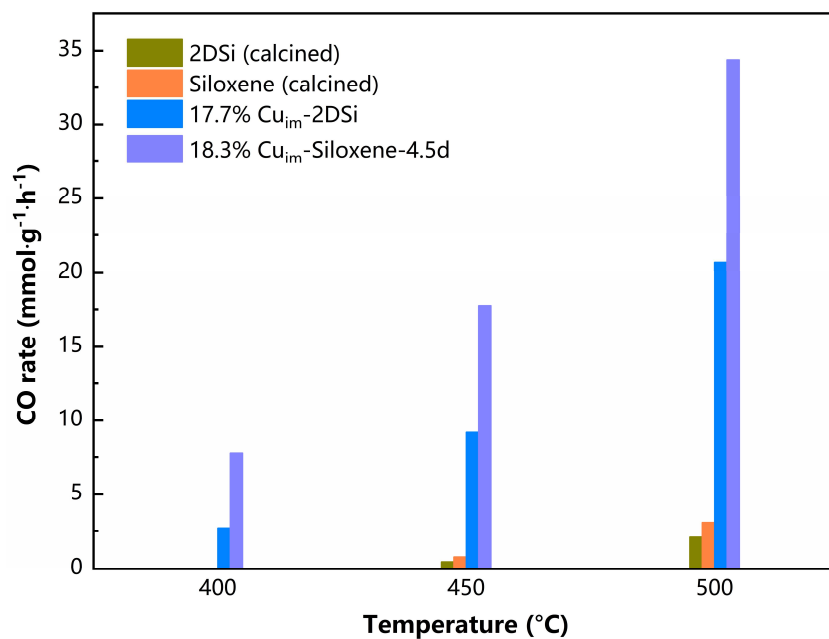

**Fig. S10** CO production rates of different samples in thermocatalytic reactions (testing condition: 30 mg of the catalyst, CO<sub>2</sub>/H<sub>2</sub>/N<sub>2</sub> = ~5/20/5, ambient pressure).

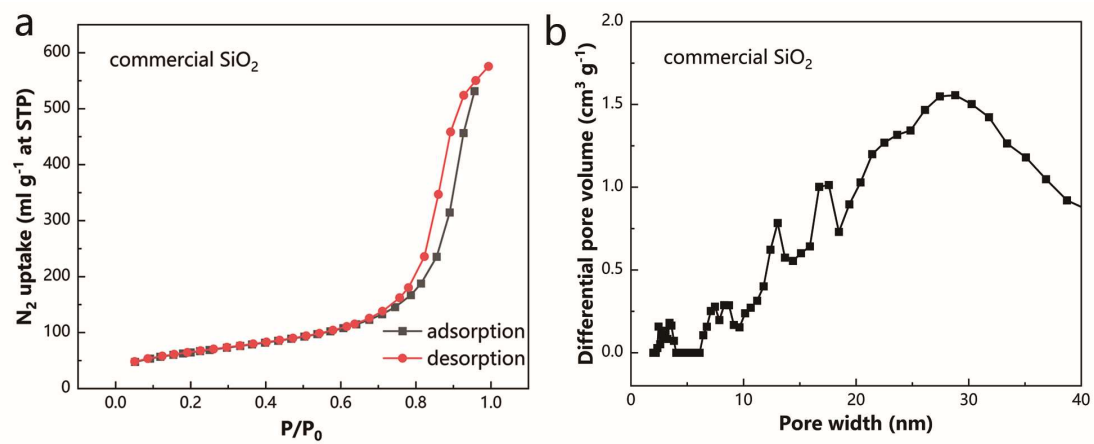

**Fig. S11** (a) N<sub>2</sub> adsorption-desorption isotherms and (b) pore size distribution curves of commercial SiO<sub>2</sub>.

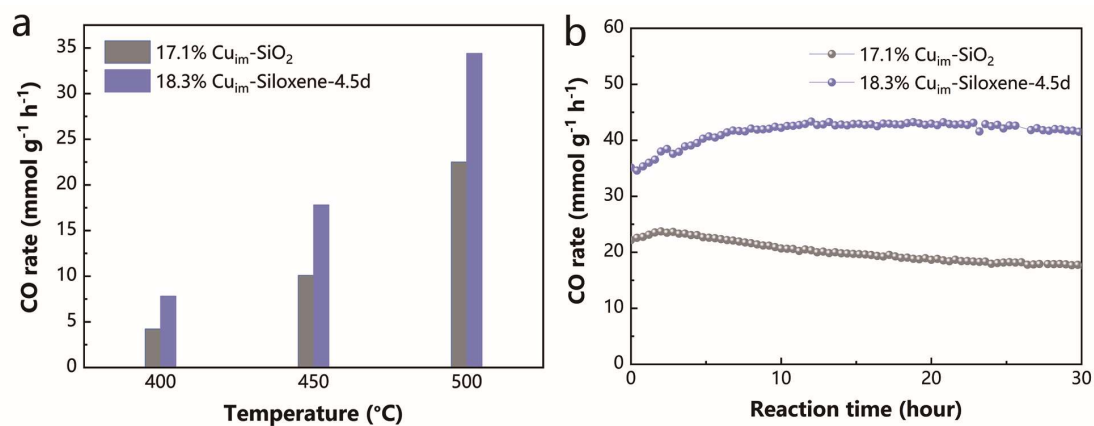

**Fig. S12** CO production rates of 17.1%Cu<sub>im</sub>-SiO<sub>2</sub> and 18.3%Cu<sub>im</sub>-siloxene-4.5d in thermal catalytic reactions (testing condition: 30 mg of the catalyst, CO<sub>2</sub>/H<sub>2</sub>/N<sub>2</sub> = ~5/20/5, ambient pressure).

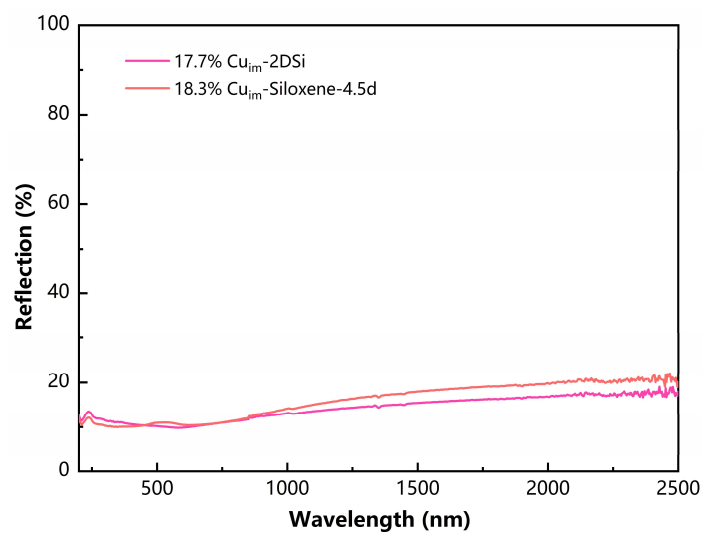

**Fig. S13** Diffuse reflectance spectra of 17.7%Cu<sub>im</sub>-2DSi and 18.3%Cu<sub>im</sub>-Siloxene-4.5d.

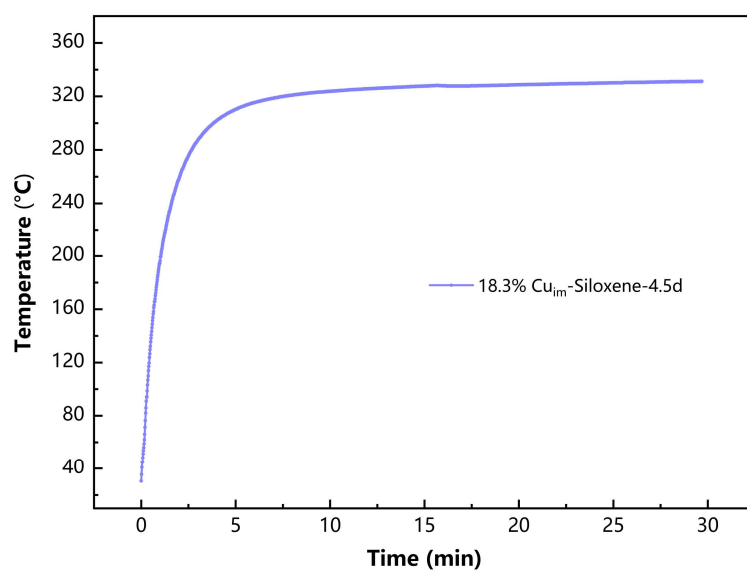

**Fig. S14** Surface temperature profile of 18.3%Cu<sub>im</sub>-Siloxene-4.5d under 34.3-suns illumination.

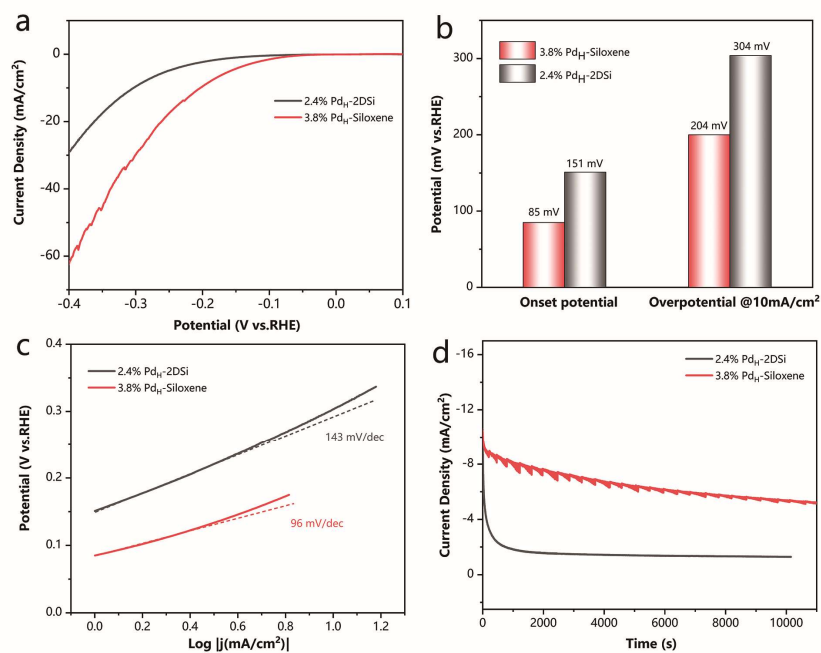

**Fig. S15** (a) Polarization curves of the 2.4% Pd<sub>H</sub>-2DSi and 3.8% Pd<sub>H</sub>-siloxene-4.5d catalysts. (b) Comparison of overpotential at 10 mA/cm<sup>2</sup> and onset potential of the catalysts. (c) Tafel plots of the catalysts. (d) chronoamperometry tests of the catalysts.



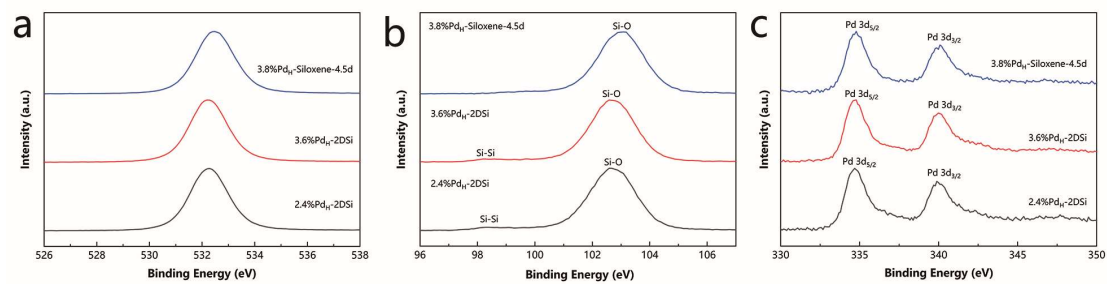

**Fig. S16** (a) O 1s, (b) Si 2p, and (c) Pd 3d XPS spectra of the different Pd catalysts.

**Table S1** Crystallite size of the metals in different samples estimated using the Scherrer Equation based on the XRD patterns.

| Samples                        | 18.3%Cu <sub>im</sub> -Siloxene-4.5d | 17.7%Cu <sub>im</sub> -2DSi | 3.8%Pd <sub>H</sub> -Siloxene-4.5d | 3.6%Pd <sub>H</sub> -2DSi | 2.4%Pd <sub>H</sub> -2DSi |
|--------------------------------|--------------------------------------|-----------------------------|------------------------------------|---------------------------|---------------------------|
| Metallic crystallite size (nm) | 9                                    | 11                          | 11                                 | 17                        | 13                        |

**Table S2** CO rates of different samples in photothermal catalytic reactions (testing condition: 15 mg of the catalyst, CO<sub>2</sub>/H<sub>2</sub>/N<sub>2</sub> = ~2.5/10/2.5, ambient pressure).

| Light Illumination (suns) | 17.7%Cu <sub>im</sub> -2DSi | 15.9%Cu <sub>im</sub> -Siloxene (no NaOH) | 18.3%Cu <sub>im</sub> -Siloxene |
|---------------------------|-----------------------------|-------------------------------------------|---------------------------------|
| 20.0                      | 0.000                       | 0.628                                     | 1.245                           |
| 24.2                      | 0.483                       | 0.875                                     | 3.040                           |
| 34.3                      | 1.898                       | 3.818                                     | 8.403                           |
